# Supplementary material for: Acute and long-term outcomes of SARS-CoV-2 infection in school-aged children in England: Study protocol for the joint analysis of the COVID-19 schools infection survey (SIS) and the COVID-19 mapping and mitigation in schools (CoMMinS) study
Source: PubMed Central journal article supplement (PMC11111005; doi:10.1371/journal.pone.0303892), 2024-05-22
Supplement: pone.0303892.s002.pdf [file pone.0303892.s002.pdf]

**S1 Table: Comparison of key demographic, clinical, symptom and educational variables for SIS-1 and CoMMinS, and result of harmonization of these variables for analysis.**

| Type of data | CoMMinS                                     |                                         |                                      |                                                          | SIS                                                                     |                                                                             |                                         |                                      | Harmonised                                               |                                                                         |                                                       |                           |                                 |                                                                                                                                       |                    |   |                                |                                                                                     |
|--------------|---------------------------------------------|-----------------------------------------|--------------------------------------|----------------------------------------------------------|-------------------------------------------------------------------------|-----------------------------------------------------------------------------|-----------------------------------------|--------------------------------------|----------------------------------------------------------|-------------------------------------------------------------------------|-------------------------------------------------------|---------------------------|---------------------------------|---------------------------------------------------------------------------------------------------------------------------------------|--------------------|---|--------------------------------|-------------------------------------------------------------------------------------|
|              | Description of informing survey variable(s) | Name(s) of informing survey variable(s) | Type of informing survey variable(s) | Time of data collection for informing survey variable(s) | Available categories for analysis across all informing survey variables | Description of informing survey variable(s)                                 | Name(s) of informing survey variable(s) | Type of informing survey variable(s) | Time of data collection for informing survey variable(s) | Available categories for analysis across all informing survey variables | Name of analysis variable                             | Type of analysis variable | Categories of analysis variable |                                                                                                                                       |                    |   |                                |                                                                                     |
| Demographic  | Gender                                      | gender_id                               | N                                    | B                                                        | Female                                                                  | Gender                                                                      | enrol_gender                            | S                                    | B                                                        | Female<br>Male<br>Other<br>Prefer not to say                            | gender                                                | C                         | Female<br>Male<br>Other         |                                                                                                                                       |                    |   |                                |                                                                                     |
|              |                                             | gender_other                            | F                                    | B                                                        | Other                                                                   |                                                                             |                                         |                                      |                                                          |                                                                         |                                                       |                           |                                 |                                                                                                                                       |                    |   |                                |                                                                                     |
|              | Age                                         | Week of birth                           | WoB                                  | N                                                        | B                                                                       | <Age in weeks>                                                              | Date of birth                           | enrol_dob                            | S                                                        | B                                                                       | <Age in weeks>                                        | age                       | N                               | <Age in years>                                                                                                                        |                    |   |                                |                                                                                     |
|              |                                             | Month of birth                          | MoB                                  | N                                                        | B                                                                       |                                                                             |                                         |                                      |                                                          |                                                                         |                                                       |                           |                                 |                                                                                                                                       |                    |   |                                |                                                                                     |
|              |                                             | Year of birth                           | YoB                                  | N                                                        | B                                                                       |                                                                             |                                         |                                      |                                                          |                                                                         |                                                       |                           |                                 |                                                                                                                                       |                    |   |                                |                                                                                     |
|              | Ethnicity                                   | Ethnicity                               | ethnicity_cat1                       | N                                                        | B                                                                       | African<br>Caribbean                                                        | Ethnicity                               | enrol_ethnic_asia                    | S                                                        | B                                                                       | Black / African / Caribbean / Black British - African | ethnicity                 | C                               | Black / African / Caribbean / Black British<br>Asian / Asian British<br>White<br>Other ethnic group<br>Mixed / Multiple ethnic groups |                    |   |                                |                                                                                     |
|              |                                             |                                         | ethnicity_cat2                       | N                                                        | B                                                                       | Any other Black / African / Caribbean background                            |                                         |                                      |                                                          |                                                                         |                                                       |                           |                                 |                                                                                                                                       | enrol_ethnic_blk   | S | B                              | Black / African / Caribbean / Black British - Caribbean                             |
|              |                                             |                                         | ethnicity_cat2_other                 | F                                                        | B                                                                       | Bangladeshi<br>Chinese<br>Indian<br>Pakistani<br>Any other Asian background |                                         |                                      |                                                          |                                                                         |                                                       |                           |                                 |                                                                                                                                       | enrol_ethnic_main  | S | B                              | Black / African / Caribbean / Black British - Any other Black / African / Caribbean |
|              |                                             |                                         |                                      |                                                          |                                                                         | English / Welsh / Scottish / Northern Irish / British                       |                                         |                                      |                                                          |                                                                         |                                                       |                           |                                 |                                                                                                                                       | enrol_ethnic_mix   | S | B                              | Asian / Asian British - Bangladeshi                                                 |
|              |                                             |                                         |                                      |                                                          |                                                                         | Irish                                                                       |                                         |                                      |                                                          |                                                                         |                                                       |                           |                                 |                                                                                                                                       | enrol_ethnic_other | S | B                              | Asian / Asian British - Chinese                                                     |
|              |                                             |                                         |                                      |                                                          | Gypsy or Irish traveller                                                | enrol_ethnic_other_spec                                                     |                                         |                                      |                                                          |                                                                         |                                                       |                           |                                 |                                                                                                                                       | S                  | B | Asian / Asian British - Indian |                                                                                     |
|              |                                             |                                         |                                      | enrol_ethnic_wht                                         | S                                                                       | B                                                                           | Asian / Asian British - Pakistani       |                                      |                                                          |                                                                         |                                                       |                           |                                 |                                                                                                                                       |                    |   |                                |                                                                                     |
|              |                                             |                                         |                                      |                                                          |                                                                         |                                                                             |                                         |                                      | Asian / Asian British - Any other Asian background       |                                                                         |                                                       |                           |                                 |                                                                                                                                       |                    |   |                                |                                                                                     |

|  |                            |                                              |                                 |                                                                                                                                                                                                                                                                                                                                                                       |                                                                                                                                                                                                         |                                                                                                                                                                                                                                                                                                                                  |                                          |                                                                                                 |                                                                                  |                                                                                                                                                                                                                                                                                                                                                                                                                                                                    |                                                                 |                      |                                                                                                                                                                                                                          |
|--|----------------------------|----------------------------------------------|---------------------------------|-----------------------------------------------------------------------------------------------------------------------------------------------------------------------------------------------------------------------------------------------------------------------------------------------------------------------------------------------------------------------|---------------------------------------------------------------------------------------------------------------------------------------------------------------------------------------------------------|----------------------------------------------------------------------------------------------------------------------------------------------------------------------------------------------------------------------------------------------------------------------------------------------------------------------------------|------------------------------------------|-------------------------------------------------------------------------------------------------|----------------------------------------------------------------------------------|--------------------------------------------------------------------------------------------------------------------------------------------------------------------------------------------------------------------------------------------------------------------------------------------------------------------------------------------------------------------------------------------------------------------------------------------------------------------|-----------------------------------------------------------------|----------------------|--------------------------------------------------------------------------------------------------------------------------------------------------------------------------------------------------------------------------|
|  |                            |                                              |                                 |                                                                                                                                                                                                                                                                                                                                                                       | Any other White background<br>Arab<br>White and Asian<br>White and Black African<br>White and Black Caribbean<br>Any other mixed / multiple ethnic group<br>Any other ethnic group<br>Prefer not to say |                                                                                                                                                                                                                                                                                                                                  |                                          |                                                                                                 |                                                                                  | White - English / Welsh / Scottish / Northern Irish / British<br>White - Irish<br>White - Gypsy or Irish Traveller<br>White - Any other White background<br>Other ethnic group - Arab<br>Mixed / Multiple ethnic groups - White and Asian<br>Mixed / Multiple ethnic groups - White and Black African<br>Mixed / Multiple ethnic groups - White and Black Caribbean<br>Any other mixed / multiple ethnic background<br>Other ethnic group - Any other ethnic group |                                                                 |                      |                                                                                                                                                                                                                          |
|  | Socio-economic deprivation | Index of Multiple Deprivation 2019 (deciles) | lsoa11cd                        | T B                                                                                                                                                                                                                                                                                                                                                                   | 1 (most deprived)<br>2<br>3<br>4<br>5<br>6<br>7<br>8<br>9<br>10 (least deprived)                                                                                                                        | Index of Multiple Deprivation 2019 (deciles)                                                                                                                                                                                                                                                                                     | enrol_postcode                           | S B                                                                                             | 1 (most deprived)<br>2<br>3<br>4<br>5<br>6<br>7<br>8<br>9<br>10 (least deprived) |                                                                                                                                                                                                                                                                                                                                                                                                                                                                    | Index of Multiple Deprivation 2019 (deciles)                    | C                    | 1 (most deprived)<br>2<br>3<br>4<br>5<br>6<br>7<br>8<br>9<br>10 (least deprived)                                                                                                                                         |
|  | School                     | School type                                  | school_type                     | T B                                                                                                                                                                                                                                                                                                                                                                   | Primary<br>Secondary<br>Sixth Form                                                                                                                                                                      | School type                                                                                                                                                                                                                                                                                                                      | enrol_schl_year<br>enrol_schl_year_in fo | S B<br>S B                                                                                      | Primary<br>Secondary<br>Sixth Form                                               |                                                                                                                                                                                                                                                                                                                                                                                                                                                                    | school_type                                                     | C                    | Primary<br>Secondary<br>Sixth Form                                                                                                                                                                                       |
|  | Clinical                   | Long term medical condition                  | Has long term medical condition | health_status<br>health_change_descriptio<br>long_term_medical_conditio<br>medical_condition_1<br>medical_condition_2<br>medical_condition_3<br>medical_condition_4<br>medical_condition_5<br>medical_condition_6<br>medical_condition_7<br>medical_condition_8<br>medical_condition_9<br>medical_condition_10<br>medical_condition_11<br>other_medical_conditio<br>n | N F<br>F F<br>N B<br>N B<br>F B                                                                                     | Has a long term medical condition<br>Does not have a long term medical condition<br>Has asthma<br>Has chronic lung disease<br>Has heart disease<br>Has high blood pressure<br>Has diabetes<br>Has depression<br>Has anxiety<br>Has immunodeficiency<br>Has kidney disease<br>Has cancer<br>Has other long term medical condition | Has long term medical condition          | ext_child_illness<br>ext_child_illness_what<br>ext_child_illness_heart<br>ext_child_illness_oth | S B<br>S B<br>S B<br>S B                                                         | Has a long term medical condition<br>Does not have a long term medical condition<br>Do not know if have a long term medical condition<br>Prefer not to say if have a long term medical condition<br>Has diabetes<br>Has asthma<br>Has heart condition<br>Has other long term medical condition                                                                                                                                                                     | long_term_conditio<br>asthma<br>diabetes<br>heart_conditio<br>n | Bi<br>Bi<br>Bi<br>Bi | Has a long term medical condition<br>Does not have a long term medical condition<br>Has asthma<br>Does not have asthma<br>Has diabetes<br>Does not have diabetes<br>Has heart condition<br>Does not have heart condition |

|                     |                         |                               |                          |                     |    |                                                                                                                                                                                                                                       |                                |                                            |                                                                                                   |   |                                                                                                                                                                                                                                                                                                                                                                                                                                                                                                                                |                 |                         |                                                                   |                                                                                                           |
|---------------------|-------------------------|-------------------------------|--------------------------|---------------------|----|---------------------------------------------------------------------------------------------------------------------------------------------------------------------------------------------------------------------------------------|--------------------------------|--------------------------------------------|---------------------------------------------------------------------------------------------------|---|--------------------------------------------------------------------------------------------------------------------------------------------------------------------------------------------------------------------------------------------------------------------------------------------------------------------------------------------------------------------------------------------------------------------------------------------------------------------------------------------------------------------------------|-----------------|-------------------------|-------------------------------------------------------------------|-----------------------------------------------------------------------------------------------------------|
| COVID-19 symptoms   | Acute COVID-19 symptoms | No symptoms                   | no_symptoms              | N                   | BF | Had no symptoms in last 30 days                                                                                                                                                                                                       | Symptom +/- 7 days of sampling | ext_SYMPTOM / fw_SYMPTOM                   | S                                                                                                 | B | Had shortness of breath / difficulty breathing in 7 days before / after sampling<br>Had headaches in 7 days before / after sampling<br>Had muscle ache (myalgia) in 7 days before / after sampling<br>Had tiredness / fatigue in 7 days before / after sampling<br>Had nausea / vomiting in 7 days before / after sampling<br>Had abdominal pain in 7 days before / after sampling<br>Had diarrhoea in 7 days before / after sampling<br>Had loss or change to their sense of smell or taste in 7 days before / after sampling | recent_symptoms | Bi                      | Recent symptoms<br>No recent symptoms                             |                                                                                                           |
|                     |                         | Symptom in last 30 days       | fever_1                  | N                   | BF | Had fever in last 30 days                                                                                                                                                                                                             | Date of onset                  | ext_SYMPTOM_date / fw_SYMPTOM_date         | S                                                                                                 | B |                                                                                                                                                                                                                                                                                                                                                                                                                                                                                                                                | recent_fever    | Bi                      | Recent fever and / or shivers<br>No recent fever and / or shivers |                                                                                                           |
|                     |                         |                               | shivers_chills_1         | N                   | BF | Has shivers / chills in last 30 days                                                                                                                                                                                                  | Duration                       | ext_SYMPTOM_duration / fw_SYMPTOM_duration | S                                                                                                 | B | F                                                                                                                                                                                                                                                                                                                                                                                                                                                                                                                              |                 | recent_cough            | Bi                                                                | Recent cough<br>No recent cough                                                                           |
|                     |                         |                               | cough_1                  | N                   | BF | Had cough in last 30 days                                                                                                                                                                                                             |                                |                                            |                                                                                                   |   |                                                                                                                                                                                                                                                                                                                                                                                                                                                                                                                                |                 |                         |                                                                   |                                                                                                           |
|                     |                         |                               | runny_nose_1             | N                   | BF | Had runny nose in last 30 days                                                                                                                                                                                                        |                                |                                            |                                                                                                   |   |                                                                                                                                                                                                                                                                                                                                                                                                                                                                                                                                |                 | recent_sore_throat      | Bi                                                                | Recent sore throat<br>No recent sore throat                                                               |
|                     |                         |                               | sneezing_1               | N                   | BF | Had sneezing in last 30 days                                                                                                                                                                                                          |                                |                                            |                                                                                                   |   |                                                                                                                                                                                                                                                                                                                                                                                                                                                                                                                                |                 | recent_breathlessness   | Bi                                                                | Recent shortness of breath / difficulty breathing<br>No recent shortness of breath / difficulty breathing |
|                     |                         |                               | sore_throat_1            | N                   | BF | Had sore throat in last 30 days                                                                                                                                                                                                       |                                |                                            |                                                                                                   |   |                                                                                                                                                                                                                                                                                                                                                                                                                                                                                                                                |                 | recent_headache         | Bi                                                                | Recent headaches<br>No recent headaches                                                                   |
|                     |                         |                               | short_breath_diff_1      | N                   | BF | Had shortness of breath or difficulty breathing in last 30 days                                                                                                                                                                       |                                |                                            |                                                                                                   |   |                                                                                                                                                                                                                                                                                                                                                                                                                                                                                                                                |                 | recent_muscle_ache      | Bi                                                                | Recent muscle ache<br>No recent muscle ache                                                               |
|                     |                         |                               | headache_1               | N                   | BF | Had headache in last 30 days                                                                                                                                                                                                          |                                |                                            |                                                                                                   |   |                                                                                                                                                                                                                                                                                                                                                                                                                                                                                                                                |                 | recent_fatigue          | Bi                                                                | Recent fatigue<br>No recent fatigue                                                                       |
|                     |                         |                               | muscle_joint_aches_1     | N                   | BF | Had general muscle / joint aches / pains in last 30 days                                                                                                                                                                              |                                |                                            |                                                                                                   |   |                                                                                                                                                                                                                                                                                                                                                                                                                                                                                                                                |                 | recent_sickness         | Bi                                                                | Recent nausea and / or vomiting<br>No recent nausea and / or vomiting                                     |
|                     |                         |                               | tiredness_fatigue_1      | N                   | BF | Has unusual tiredness fatigue / exhaustion in last 30 days                                                                                                                                                                            |                                |                                            |                                                                                                   |   |                                                                                                                                                                                                                                                                                                                                                                                                                                                                                                                                |                 | recent_abdominal_pain   | Bi                                                                | Recent abdominal pain<br>No recent abdominal pain                                                         |
|                     |                         |                               | nausea_vomiting_1        | N                   | BF | Had nausea in last 30 days                                                                                                                                                                                                            |                                |                                            |                                                                                                   |   |                                                                                                                                                                                                                                                                                                                                                                                                                                                                                                                                |                 | recent_diarrhoea        | Bi                                                                | Recent diarrhoea<br>No recent diarrhoea                                                                   |
|                     |                         |                               | vomiting_1               | N                   | BF | Had vomiting in last 30 days                                                                                                                                                                                                          |                                |                                            |                                                                                                   |   |                                                                                                                                                                                                                                                                                                                                                                                                                                                                                                                                |                 | recent_taste_smell_loss | Bi                                                                | Recent loss of taste / smell<br>No recent loss of taste / smell                                           |
|                     |                         |                               | abdominal_tummy_cramps_1 | N                   | BF | Has abdominal cramps in last 30 days                                                                                                                                                                                                  |                                |                                            |                                                                                                   |   |                                                                                                                                                                                                                                                                                                                                                                                                                                                                                                                                |                 |                         |                                                                   |                                                                                                           |
|                     |                         |                               | diarrhoea_1              | N                   | BF | Had diarrhoea in last 30 days                                                                                                                                                                                                         |                                |                                            |                                                                                                   |   |                                                                                                                                                                                                                                                                                                                                                                                                                                                                                                                                |                 |                         |                                                                   |                                                                                                           |
|                     |                         |                               | rash_on_toes_or_feet_1   | N                   | BF | Had rash on toes or feet in last 30 days                                                                                                                                                                                              |                                |                                            |                                                                                                   |   |                                                                                                                                                                                                                                                                                                                                                                                                                                                                                                                                |                 |                         |                                                                   |                                                                                                           |
|                     |                         |                               | rash_elsewhere_desc_1    | N                   | BF | Had rash elsewhere in last 30 days                                                                                                                                                                                                    |                                |                                            |                                                                                                   |   |                                                                                                                                                                                                                                                                                                                                                                                                                                                                                                                                |                 |                         |                                                                   |                                                                                                           |
|                     |                         |                               | loss_of_smell_1          | N                   | BF | Had loss of smell in last 30 days                                                                                                                                                                                                     |                                |                                            |                                                                                                   |   |                                                                                                                                                                                                                                                                                                                                                                                                                                                                                                                                |                 |                         |                                                                   |                                                                                                           |
|                     |                         |                               | loss_of_taste_1          | N                   | BF | Had loss of taste in last 30 days                                                                                                                                                                                                     |                                |                                            |                                                                                                   |   |                                                                                                                                                                                                                                                                                                                                                                                                                                                                                                                                |                 |                         |                                                                   |                                                                                                           |
|                     |                         |                               | other_symptoms_1         | N                   | BF | Other symptoms                                                                                                                                                                                                                        |                                |                                            |                                                                                                   |   |                                                                                                                                                                                                                                                                                                                                                                                                                                                                                                                                |                 |                         |                                                                   |                                                                                                           |
|                     | other_rash_location     | N                             | BF                       | Other rash location |    |                                                                                                                                                                                                                                       |                                |                                            |                                                                                                   |   |                                                                                                                                                                                                                                                                                                                                                                                                                                                                                                                                |                 |                         |                                                                   |                                                                                                           |
| Long-COVID symptoms | N/A                     | Had symptoms ongoing >4 weeks | end_ongoing_symptoms     | S                   | F  | Had persistent COVID-19-related symptoms >4 weeks<br>Had ongoing symptomatic COVID-19<br>Had post-COVID-19 syndrome                                                                                                                   | long_covid                     | Bi                                         | Persistent COVID-19-related symptoms >4 weeks<br>No persistent COVID-19-related symptoms >4 weeks |   |                                                                                                                                                                                                                                                                                                                                                                                                                                                                                                                                |                 |                         |                                                                   |                                                                                                           |
|                     |                         | Duration                      | end_symptoms_duration    | S                   | F  | Had persistent fever<br>Had persistent headache                                                                                                                                                                                       | ongoing_symptomatic_covid      | Bi                                         | Ongoing symptomatic COVID-19<br>No ongoing symptomatic COVID-19                                   |   |                                                                                                                                                                                                                                                                                                                                                                                                                                                                                                                                |                 |                         |                                                                   |                                                                                                           |
|                     |                         | Symptom ongoing >4 weeks      | end_symptoms_SYMPTOM     | S                   | F  | Had persistent muscle ache<br>Had persistent weakness / tiredness<br>Had persistent nausea / vomiting<br>Had persistent abdominal pain<br>Had persistent diarrhoea<br>Had persistent loss of appetite<br>Had persistent loss of taste | post_covid_syndrome            | Bi                                         | Post-COVID-19 syndrome<br>No post-COVID-19 syndrome                                               |   |                                                                                                                                                                                                                                                                                                                                                                                                                                                                                                                                |                 |                         |                                                                   |                                                                                                           |
|                     |                         |                               |                          |                     |    |                                                                                                                                                                                                                                       | persistent_fever               | Bi                                         | Persistent fever<br>No persistent fever                                                           |   |                                                                                                                                                                                                                                                                                                                                                                                                                                                                                                                                |                 |                         |                                                                   |                                                                                                           |

|  |  |                                                                                                                                                                                                                                                                                                                                                                                                                                                                                                                                                                                                                  |                                                                                                                                                                                                                                                                                                                                                                                                                                                                                                                                                                                                                                                                                                                                                                                                                                                                                                                                                                                                                                                                                                                                                                                                                                                                                                                                                                                                                                                                                                                                                                                                                                                                                                                                                                                                                                                                                                                                                                                                                                                                                                                                                                                                                                                                                                                                                                                                                                                                                                                                                                                                                                       |
|--|--|------------------------------------------------------------------------------------------------------------------------------------------------------------------------------------------------------------------------------------------------------------------------------------------------------------------------------------------------------------------------------------------------------------------------------------------------------------------------------------------------------------------------------------------------------------------------------------------------------------------|---------------------------------------------------------------------------------------------------------------------------------------------------------------------------------------------------------------------------------------------------------------------------------------------------------------------------------------------------------------------------------------------------------------------------------------------------------------------------------------------------------------------------------------------------------------------------------------------------------------------------------------------------------------------------------------------------------------------------------------------------------------------------------------------------------------------------------------------------------------------------------------------------------------------------------------------------------------------------------------------------------------------------------------------------------------------------------------------------------------------------------------------------------------------------------------------------------------------------------------------------------------------------------------------------------------------------------------------------------------------------------------------------------------------------------------------------------------------------------------------------------------------------------------------------------------------------------------------------------------------------------------------------------------------------------------------------------------------------------------------------------------------------------------------------------------------------------------------------------------------------------------------------------------------------------------------------------------------------------------------------------------------------------------------------------------------------------------------------------------------------------------------------------------------------------------------------------------------------------------------------------------------------------------------------------------------------------------------------------------------------------------------------------------------------------------------------------------------------------------------------------------------------------------------------------------------------------------------------------------------------------------|
|  |  | <p>Had persistent loss of smell</p> <p>Had persistent sore throat</p> <p>Had persistent cough</p> <p>Had persistent shortness of breath</p> <p>Had persistent chest pain</p> <p>Had persistent palpitations</p> <p>Had persistent vertigo / dizziness</p> <p>Had persistent worry / anxiety</p> <p>Had persistent low mood / not enjoying anything</p> <p>Had persistent trouble sleeping</p> <p>Had persistent memory loss or confusion</p> <p>Had persistent difficulty concentrating</p> <p>Had persistent sensations in skin, such as prickling, tingling or burning</p> <p>Had other persistent symptom</p> | <p>persistent_headache</p> <p>Bi</p> <p>Persistent headache</p> <p>No persistent headache</p> <p>persistent_muscle_ache</p> <p>Bi</p> <p>Persistent muscle ache</p> <p>No persistent muscle ache</p> <p>persistent_fatigue</p> <p>Bi</p> <p>Persistent weakness / tiredness</p> <p>No persistent weakness / tiredness</p> <p>persistent_sickness</p> <p>Bi</p> <p>Persistent nausea / vomiting</p> <p>No persistent nausea / vomiting</p> <p>persistent_abdominal_pain</p> <p>Bi</p> <p>Persistent abdominal pain</p> <p>No persistent abdominal pain</p> <p>persistent_appetite_loss</p> <p>Bi</p> <p>Persistent loss of appetite</p> <p>No persistent loss of appetite</p> <p>persistent_diarrhoea</p> <p>Bi</p> <p>Persistent diarrhoea</p> <p>No persistent diarrhoea</p> <p>persistent_taste_loss</p> <p>Bi</p> <p>Persistent loss of taste</p> <p>No persistent loss of taste</p> <p>persistent_smell_loss</p> <p>Bi</p> <p>Persistent loss of smell</p> <p>No persistent loss of smell</p> <p>persistent_sore_throat</p> <p>Bi</p> <p>Persistent sore throat</p> <p>No persistent sore throat</p> <p>persistent_cough</p> <p>Bi</p> <p>Persistent cough</p> <p>No persistent cough</p> <p>persistent_shortness_of_breath</p> <p>Bi</p> <p>Persistent shortness of breath</p> <p>No persistent shortness of breath</p> <p>persistent_chest_pain</p> <p>Bi</p> <p>Persistent chest pain</p> <p>No persistent chest pain</p> <p>persistent_palpitations</p> <p>Bi</p> <p>Persistent palpitations</p> <p>No persistent palpitations</p> <p>persistent_anxiety</p> <p>Bi</p> <p>Persistent worry / anxiety</p> <p>No persistent worry / anxiety</p> <p>persistent_dizziness</p> <p>Bi</p> <p>Persistent vertigo / dizziness</p> <p>No persistent vertigo / dizziness</p> <p>persistent_depression</p> <p>Bi</p> <p>Persistent low mood / not enjoying anything</p> <p>No persistent low mood / not enjoying anything</p> <p>persistent_insomnia</p> <p>Bi</p> <p>Persistent trouble sleeping</p> <p>No persistent trouble sleeping</p> <p>persistent_memory_loss</p> <p>Bi</p> <p>Persistent memory loss or confusion</p> <p>No persistent memory loss or confusion</p> <p>persistent_difficulty_concentrating</p> <p>Bi</p> <p>Persistent difficulty concentrating</p> <p>No persistent difficulty concentrating</p> <p>persistent_skin_sensations</p> <p>Bi</p> <p>Persistent sensations in skin, such as prickling, tingling or burning</p> <p>No persistent sensations in skin, such as prickling, tingling or burning</p> <p>persistent_other</p> <p>Bi</p> <p>Persistent other symptom</p> <p>No persistent other symptom</p> |
|--|--|------------------------------------------------------------------------------------------------------------------------------------------------------------------------------------------------------------------------------------------------------------------------------------------------------------------------------------------------------------------------------------------------------------------------------------------------------------------------------------------------------------------------------------------------------------------------------------------------------------------|---------------------------------------------------------------------------------------------------------------------------------------------------------------------------------------------------------------------------------------------------------------------------------------------------------------------------------------------------------------------------------------------------------------------------------------------------------------------------------------------------------------------------------------------------------------------------------------------------------------------------------------------------------------------------------------------------------------------------------------------------------------------------------------------------------------------------------------------------------------------------------------------------------------------------------------------------------------------------------------------------------------------------------------------------------------------------------------------------------------------------------------------------------------------------------------------------------------------------------------------------------------------------------------------------------------------------------------------------------------------------------------------------------------------------------------------------------------------------------------------------------------------------------------------------------------------------------------------------------------------------------------------------------------------------------------------------------------------------------------------------------------------------------------------------------------------------------------------------------------------------------------------------------------------------------------------------------------------------------------------------------------------------------------------------------------------------------------------------------------------------------------------------------------------------------------------------------------------------------------------------------------------------------------------------------------------------------------------------------------------------------------------------------------------------------------------------------------------------------------------------------------------------------------------------------------------------------------------------------------------------------------|

|             |                 |                                                                 |                                       |   |    |                                                                                                                                                                                                            |                                                           |                    |   |   |                                                                                                                                                                                                                          |                            |    |                                                                                                                                                        |  |
|-------------|-----------------|-----------------------------------------------------------------|---------------------------------------|---|----|------------------------------------------------------------------------------------------------------------------------------------------------------------------------------------------------------------|-----------------------------------------------------------|--------------------|---|---|--------------------------------------------------------------------------------------------------------------------------------------------------------------------------------------------------------------------------|----------------------------|----|--------------------------------------------------------------------------------------------------------------------------------------------------------|--|
| Educational | School absences | No. days off school due to non-COVID-19 illness in past 30 days | symp_no_absnt_30_days                 | N | BF | Off school due to COVID-19-related reason in past 30 days<br>Off school due to illness not related to COVID-19 in past 30 days<br>No. days off school due to medically diagnosed COVID-19 (confirmed by a  | Absent in past 4 weeks for any reason                     | fw_absnt           | S | F | Off school due to COVID-19-related illness in past 28 days<br>Off school due to illness not related to COVID-19 in past 28 days<br>No. days off school due to any illness in past 28 days if all absences due to illness | off_school_illness         | Bi | Off school due to either COVID-19 or non-COVID-19 illness in past month<br>Not off school due to either COVID-19 or non-COVID-19 illness in past month |  |
|             |                 | No. days off school due to COVID-19 illness in past 30 days     | symp_no_covid_absnt_30_days           | N | BF | doctor) in past 30 days<br>No. days off school due to suspected COVID-19 (not medically confirmed) in past 30 days<br>No. days off school because of other illness not related to COVID-19 in past 30 days | No. days off school missed in past 4 weeks for any reason | fw_absnt_no        | S | F |                                                                                                                                                                                                                          | no_days_off_school_illness | N  | No. days off school due to COVID-19 or non-COVID-19 illness in past month                                                                              |  |
|             |                 | No. days off school due to confirmed COVID-19 in past 30 days   | symp_no_covid_absnt_confirmed_by_dr   | N | BF |                                                                                                                                                                                                            | Any absences COVID-19 related                             | fw_absnt_reason    | S | F |                                                                                                                                                                                                                          |                            |    |                                                                                                                                                        |  |
|             |                 | No. days off school due to unconfirmed COVID-19 in past 30 days | symp_no_suspected_covid_absnt_30_days | N | BF |                                                                                                                                                                                                            | COVID-19 related reason(s)                                | fw_absnt_not_covid | S | F |                                                                                                                                                                                                                          |                            |    |                                                                                                                                                        |  |
|             |                 | No. days off school due to non-COVID-19 illness in past 30 days | symp_no_other_absnt_30_days           | N | BF |                                                                                                                                                                                                            | Non-COVID-19 related reason(s)                            | fw_absnt_covid     | S | F |                                                                                                                                                                                                                          |                            |    |                                                                                                                                                        |  |

N – number; T – free text; S – string; D – datetime; Bi – binary; C – categorical; B – baseline; F – follow up; BF – baseline and follow up.
