# Supplementary material for: Acute and long-term outcomes of SARS-CoV-2 infection in school-aged children in England: Study protocol for the joint analysis of the COVID-19 schools infection survey (SIS) and the COVID-19 mapping and mitigation in schools (CoMMinS) study
Source: PubMed Central journal article supplement (PMC11111005; doi:10.1371/journal.pone.0303892), 2024-05-22
Supplement: pone.0303892.s003.pdf [file pone.0303892.s003.pdf]

**S2 Table: Analysis risk factors (RQ1)/covariates (RQ2), description and informing data sources.**

| <b>Risk factor/Covariate</b>                 | <b>Type</b> | <b>Categories</b>                                                                                                   | <b>Data sources</b>                   |
|----------------------------------------------|-------------|---------------------------------------------------------------------------------------------------------------------|---------------------------------------|
| Gender                                       | Categorical | Male, Female, Other                                                                                                 | SIS-1/CoMMinS data, or EHR if missing |
| Age                                          | Continuous  | Age in years                                                                                                        | SIS-1/CoMMinS data, or EHR if missing |
| Ethnicity                                    | Categorical | Black/African/Caribbean/Black British; Asian/Asian British; White; Other ethnic group; Mixed/Multiple ethnic groups | SIS-1/CoMMinS data, or EHR if missing |
| Deprivation                                  | Categorical | Index of Multiple Deprivation 2019                                                                                  | ONS (from SIS-1 data)/CoMMinS data    |
| Symptomatic SARS-CoV-2 infection (RQ1 only)  | Binary      | Yes, No                                                                                                             | SIS-1/CoMMinS data                    |
| SARS-CoV-2 vaccination                       | Datetime    | Date of first vaccination                                                                                           | SIS-1/CoMMinS and EHR data            |
| School type                                  | Categorical | Primary, Secondary, Sixth Form                                                                                      | SIS-1/CoMMinS data                    |
| Geographical location                        | Categorical | Middle Layer Super Output Area (MSOA), local authority district, integrated care system                             | ONS (from SIS-1 data)/CoMMinS data    |
| Asthma                                       | Binary      | Yes, No                                                                                                             | SIS-1/CoMMinS and EHR data            |
| Diabetes                                     | Binary      | Yes, No                                                                                                             | SIS-1/CoMMinS and EHR data            |
| Heart condition                              | Binary      | Yes, No                                                                                                             | SIS-1/CoMMinS and EHR data            |
| Other long-term medical condition            | Binary      | Yes, No                                                                                                             | SIS-1/CoMMinS and EHR data            |
| Hospital admission in the previous 12 months | Binary      | Yes, No                                                                                                             | EHR data                              |
| SARS-CoV-2 variant                           | Categorical | S-gene status in SIS, time of infection in CoMMinS                                                                  | SIS-1/CoMMinS data                    |
