# Supplementary material for: Acute and long-term outcomes of SARS-CoV-2 infection in school-aged children in England: Study protocol for the joint analysis of the COVID-19 schools infection survey (SIS) and the COVID-19 mapping and mitigation in schools (CoMMinS) study
Source: PubMed Central journal article supplement (PMC11111005; doi:10.1371/journal.pone.0303892), 2024-05-22
Supplement: pone.0303892.s004.pdf [file pone.0303892.s004.pdf]

**S3 Table: Definition of ongoing symptomatic COVID-19 and post-COVID-19 syndrome using self-reported symptom data from CoMMinS versus SIS.**

|                | <b>Persistent self-reported symptoms</b>                                                                                                                                       |                                                                                                                                                                                                         |
|----------------|--------------------------------------------------------------------------------------------------------------------------------------------------------------------------------|---------------------------------------------------------------------------------------------------------------------------------------------------------------------------------------------------------|
|                | <b>4-12 weeks</b>                                                                                                                                                              | <b>&gt;12 weeks</b>                                                                                                                                                                                     |
| <b>CoMMinS</b> | Symptom reported as experienced during past 30 days in two or more survey rounds with 4-12 weeks of each other                                                                 | Symptom reported as experienced during past 30 days in two or more survey rounds, with the first and last report >12 weeks of each other                                                                |
| <b>SIS</b>     | (a) Symptom reported as experienced during +/- 7 days of sampling in two or more survey rounds with 4-12 weeks of each other<br>(b) Symptom reported as ongoing for 4-12 weeks | (a) Symptom reported as experienced during +/- 7 days of sampling in two or more survey rounds, with the first and last report >12 weeks of each other<br>(b) Symptom reported as ongoing for >12 weeks |
